## RESEARCH ARTICLE

# Molecular phylogeny and diversity of *Fusarium* endophytes isolated from tomato stems

Iori Imazaki\* and Ikuo Kadota

NARO Tohoku Agricultural Research Center, Morioka, Japan

\*Corresponding author: Tohoku Agricultural Research Center, National Agriculture and Food Research Organization (NARO), 4 Akahira, Shimokuriyagawa, Morioka 020-0198, Japan. Tel: +81-19-643-3524; Fax: +81-19-641-7794; E-mail: [iiori@affrc.go.jp](mailto:iiori@affrc.go.jp)

**One sentence summary:** Tomato endophytic *Fusarium* obtained in this study were classified into the dominant soil fusaria, *Fusarium oxysporum* species complex, *F. fujikuroi* species complex and *F. solani* species complex.

Editor: Angela Sessitsch

## ABSTRACT

Plant tissues are a known habitat for two types of *Fusarium* species: plant pathogens and endophytes. Here, we investigated the molecular phylogeny and diversity of endophytic fusaria, because endophytes are not as well studied as pathogens. A total of 543 *Fusarium* isolates were obtained from the inside of tomato stems cultivated in soils mainly obtained from agricultural fields. We then determined partial nucleotide sequences of the translation elongation factor-1 alpha (EF-1 $\alpha$ ) genes of the isolates. Among the isolates from tomato, 24 EF-1 $\alpha$  gene sequence types (EFST) were found: nine were classified as being from the *Fusarium oxysporum* species complex and its sister taxa (FOSC, 332 isolates), seven from the *F. fujikuroi* species complex (FFSC, 75 isolates) and eight from the *F. solani* species complex (FSSC, 136 isolates). To determine more characteristic details of the tomato isolates, we isolated 180 fusaria directly from soils and found 95% of them were nested within the FOSC (82 isolates; five EFSTs), FFSC (21 isolates; six EFSTs) and FSSC (68 isolates; 11 EFSTs). These results suggested that the dominant *Fusarium* endophytes within tomato stems were members of the same three species complexes, which were also the dominant fusaria in the soils.

**Keywords:** endophyte; *Fusarium*; tomato; EF-1 $\alpha$  gene; phylogeny; diversity

## INTRODUCTION

*Fusarium* includes a large number of strains associated with agricultural productions, such as plant pathogens (Kistler 1997; Leslie and Summerell 2006), toxin producers on edible parts of plants (Desjardins 2006) and biological control agents for plant diseases (Alabouvette et al. 2001). In ecological perspective, *Fusarium* includes epiphytes (Inácio et al. 2002) and endophytes (Leslie et al. 1990; Kuldau and Yates 2000; Bacon and Yates 2006). In addition to these agriculturally and ecologically distinct strains, many are putative saprophytic. By virtue of their agricultural and ecological characteristics, *Fusarium* has become a model organism.

Fusaria have been classified historically on the basis of morphological characteristics. In recent decades, phylogenetic-

based methods have moved taxonomy of *Fusarium* into a new phase based on molecular phylogenetics (Aoki 2009). Closely related phylogenetic species are grouped in species complexes. *Fusarium graminearum* species complex (FGSC) and *F. fujikuroi* species complex (FFSC) are examples: there are 16 species within the FGSC and over 50 species within the FFSC (Aoki, personal communication; O'Donnell, Cigelnik and Nirenberg 1998; O'Donnell et al. 2004, 2008b; Starkey et al. 2007; Aoki 2009). Although *F. oxysporum* and *F. solani* were described as single species, both comprise multiple species (Baayen et al. 2000; O'Donnell 2000; Enya et al. 2008). Based on these findings, *F. oxysporum* and *F. solani* are also now recognized as species complexes (FOSC and FFSC).

The plant pathogens in *Fusarium* cause root and stem rots, blights and wilts in a large number of cultivated plants. The

Received: 26 January 2015; Accepted: 12 August 2015

© FEMS 2015. All rights reserved. For permissions, please e-mail: [journals.permissions@oup.com](mailto:journals.permissions@oup.com)

FOSC includes more than 120 kinds of plant pathogens, which cause soil-borne diseases such as vascular wilt and root rot diseases. Each of pathogenic individual is highly host specific and their host range is limited to only one or a few plant species, called *forma specialis* (f. sp.) (Gullino, Katan and Garibaldi 2012). The FSSC includes pathogens which cause root rot diseases, and some of them are also classified as f. sp. (Aoki et al. 2003). The FFSC includes rice bakanae disease pathogen, which causes abnormal elongation of rice leaves by the production of gibberellin (Wulff et al. 2010).

Fusaria both positively and negatively affect crop cultivation: the harmful effects of pathogens and toxin producers and the beneficial effects of the biological control agents, which can be used as microbial pesticides, are easily understood. In contrast, the effects and potential of endophytes on crop cultivation are poorly understood. Furthermore, there is little information about the genetic and phylogenetic relationships between endophytes and plant pathogens, biological control agents or saprophytes. Although most endophytes are thought to be non-pathogenic (Kuldau and Yates 2000), further analyses of the ecological functions of *Fusarium* endophytes are needed to elucidate their roles in crop cultivation.

We hypothesized that *Fusarium* may be compatible with a broad range of plants, especially those in the FOSC although, in a few cases, slight disease symptoms such as discoloration and stunting were caused. This hypothesis is supported by evidence obtained in several previous studies. For example, Armstrong and Armstrong (1948) described the invasion of non-host plants by pathogenic strains of *F. oxysporum*; Banihashemi and deZeeuw (1975) reported that *F. oxysporum* f. sp. *melonis* can invade at least two non-host crops, corn and soybean; Gordon, Okamoto and Jacobson (1989) showed that the melon wilt pathogen can also invade five non-host crops (i.e. alfalfa, cotton, sugar beet, tomato and wheat); Katan (1971) found that *F. oxysporum* f. sp. *lycopercisi* could invade weeds that are non-hosts of this tomato pathogen; and Kuldau and Yates (2000) listed many plant species from which *Fusarium* endophytes were obtained. In the putative non-pathogenic members of the FOSC, the well-known biological control strain Fo47 could invade at least two crops, cucumber (Benhamou, Garand and Goulet 2002) and flax (Nagao, Couteaudie and Alabouvette 1990).

In this study, we aimed to characterize the phylogeny and diversity of *Fusarium* endophytes isolated from tomatoes (Table S1, Supporting Information). To improve the quality of the characterization, we also isolated fusaria directly from soils as a reference (Table S2, Supporting Information). Furthermore, we prepared morphologically and/or phytopathologically characterized reference strains. Some reference strains have been deposited in the MAFF gene bank system (Table S3, Supporting Information), National Institute for Agrobiological Sciences, Tsukuba, Japan. Nucleotide sequences of the translation elongation factor-1 alpha (EF-1 $\alpha$ ) gene were compared among the tomato isolates, soil isolates and reference strains. Furthermore, based our hypothesis, we confirmed the ability of some soil and tomato isolates to infect tomato and melon by means of inoculation and reisolation experiments.

## MATERIALS AND METHODS

### Location of soil sampling sites

Soils were obtained between March 2009 and June 2010 from six locations in Japan: a garden of the NARO Agricultural Research Center in Tsukuba, Ibaraki Prefecture, two commercial fields (fields A and B) in Ibaraki Prefecture, one commercial field

(field C) in Chiba Prefecture and a field of a school in Ibaraki Prefecture (field D) and a field of Nagoya University in Togo, Aichi Prefecture.

### Isolation of *Fusarium* endophytes from tomato stems

Soil-inhabiting *Fusarium* endophytes are thought to invade roots and then colonize stem vascular tissues. To obtain extensively colonizing endophytes, we isolated them from the inside of stems. Each of the soils was mixed with approximately the same weight of Kureha soil (Kureha, Tokyo, Japan), which is an artificial, aggregate-structured dry soil containing fertilizer that keeps field soils soft. The soil mixtures were dispensed into plastic baskets (33 × 25 × 10 cm deep) lined with two sheets of paper. Approximately 200 seeds of tomato cultivar Momotaro (Takii, Kyoto, Japan) were sown in the soils except for the soil sampled in Tsukuba where approximately 20 seeds were employed. After 3–6 weeks of cultivation in a greenhouse, a stem segment approximately 3.5 cm below the cotyledons was harvested from each plant and washed with tap water. Each piece was rinsed in 0.1% Tween 20 for a few seconds, then in sodium hypochlorite solution (2% effective chlorine) for 10 min and then washed four times in sterile distilled water. Each piece was then air-dried in a laminar flow chamber, and then placed on Fo-G1 agar medium (Nishimura 2007), followed by incubation at 26°C for 1–2 weeks. Fungal mycelia were transferred onto new Fo-G1 agar medium and incubated at 26°C for 2 weeks. Colonies were transferred onto synthetic low-nutrient agar media (Nirenberg and Aoki 1997). After 2 weeks incubation at 26°C, the cultures were stored at 8°C. Fungal isolates were named by a combination of two letters combined with four digits. 'SL' was the letter designation used to describe tomato isolates (Table S1, Supporting Information). Effectiveness of the surface sterilization was confirmed with the imprinting method (Shishido, Loeb and Chanway 1995): five randomly chosen pieces of surface-sterilized stems were imprinted onto fresh nutrient agar to confirm that no microbial growth was present after they had been incubated at 26°C for 2 weeks.

### Isolation of *Fusarium* directly from soils

Soils used for isolating *Fusarium* were sampled from field A and Togo in September 2010 and June 2010. These soils were passed through a sieve with a 2-mm aperture, and a portion of each sample was used to determine moisture content by air-drying at 105°C for 24 h. Fungal isolates were named by a combination of two letters (TC) combined with four digits (Table S2, Supporting Information).

A total of 6 soil samples obtained on September 2010 from field A and 10 samples obtained on June 2010 from Togo were serially diluted 10-fold with sterile distilled water. Soil suspensions (100  $\mu$ l) of each dilution were spread onto one plate of Fo-G1 agar medium. After 10 days incubation at 26°C, all fungal colonies that formed on each plate spread with a dilution equivalent of 1 mg soil (dry weight) per 100  $\mu$ l aliquot were transferred onto fresh Fo-G1 agar medium and incubated for 2 weeks at 26°C. In addition, 17 fungal colonies (15 colonies from Togo and 2 colonies from Field A) were randomly chosen from the plates of the other soil suspension dilutions.

### Partial EF-1 $\alpha$ nucleotide sequences

Fungi were grown on potato dextrose agar medium at 26°C for 10 days. Each colony was transferred into 50  $\mu$ l of TE buffer

(10 mM Tris-HCl buffer, pH 7.5, 1 mM EDTA) and then heated at 95°C for 10 min. The heated mycelial suspensions were used for templates in PCR for amplification of the EF-1 $\alpha$  gene. PCR was performed with primers EF-1 and EF-2 (O'Donnell et al. 1998) in 50  $\mu$ l containing 5  $\mu$ l of the heated mycelium suspension, 0.3  $\mu$ M each primer, 1.0 U KOD FX DNA polymerase (Toyobo, Osaka, Japan), 1 $\times$  PCR buffer for KOD FX and 0.4 mM each dNTP. The PCR profile was as follows: an initial preheating at 94°C for 2 min, followed by 35 cycles of denaturation at 98°C for 10 s, annealing at 55°C for 30 s and extension at 68°C for 40 s, and a final extension at 68°C for 7 min. To confirm amplification, 5  $\mu$ l of each sample was separated by electrophoresis using 1% agarose gels. PCR products were purified using a MinElute 96 UF PCR Purification Kit (Qiagen, Tokyo, Japan) following the manufacturer's directions. Nucleotide sequences of the purified fragments were determined directly using a BigDye Terminator Cycle Sequencing Kit version 3.1 (Life Technologies, Carlsbad, CA, USA) on a 3130 automated DNA sequencer (Life Technologies). Primer EF-22 (O'Donnell et al. 1998; Geiser et al. 2004) was used for cycle sequencing.

Unique partial sequences of the EF-1 $\alpha$  gene were aligned using the Clustal X2 program (Jeanmougin et al. 1998; Larkin et al. 2007), and phylogenetic relationships were inferred based on the nucleotide sequence alignment of the gene among the *Fusarium* isolates using MEGA5 (Tamura et al. 2011). A neighbor-joining tree was constructed based on distances determined by the method of Jukes and Cantor (1969) using 1000 bootstrap replicates. Unique nucleotide sequences were compared with nucleotide sequences registered in FUSARIUM-ID (Geiser et al. 2004; Park et al. 2011) and the DDBJ/EMBL/GenBank databases using the BLAST program (Altschul et al. 1990), and the phylogenetic position within the genus was deduced based on sequences of their closest relatives.

### Inoculation assays

Invasion of tomato plants (cultivar Momotaro) by the *Fusarium* isolates was confirmed by inoculation and reisolation experiments. Each cell of every white plastic tray (50 cells per tray  $\sim$ 75 ml each; Tokai Kasei, Mino, Japan) was filled with approximately 60 g of Kureha soil and sown with three tomato seeds. Each cell containing soil and tomato seeds received 20 ml of a conidial suspension (approximately  $3E + 07$  cells ml $^{-1}$ ) of an isolate, resulting in a density of approximately  $5E + 06$  cells g $^{-1}$ . As a negative control, each cell received 20 ml of sterile distilled water. The tomato plants were cultivated in an air-conditioned greenhouse ( $28 \pm 3^\circ\text{C}$ ) and thinned to two plants per cell. After 21–28 days of cultivation, a piece of the stem approximately 3.5 cm in length below the cotyledons of each plant was excised and then surface-sterilized as described above and incubated on Fo-G1 agar medium for 2 weeks at 28°C. To check for host specificity of the *Fusarium* isolates, their ability to colonize melon plants (cultivar Amus; Japan Horticultural Production and Research Institute, Matsudo, Japan) was tested. The method of inoculation and reisolation of the melon plants was the same as for tomato.

## RESULTS

### Isolation of *Fusarium* from tomato plants and soils and phylogenetic position of isolates by means of EF-1 $\alpha$ sequence analysis

Soils used for tomato cultivation were sampled from six locations (Field A to D, Togo, and Tsukuba) between 9 March 2009

**Table 1.** Isolation of *Fusarium* endophytes from stems of tomato plants.

| Location of soil sampling <sup>a</sup> | No. of tomato plants cultivated | No. of isolates <sup>b</sup> |      |      |
|----------------------------------------|---------------------------------|------------------------------|------|------|
|                                        |                                 | FOSC                         | FFSC | FSSC |
| Field A                                | 8995                            | 240                          | 53   | 23   |
| Field B                                | 2657                            | 12                           | 0    | 72   |
| Field C                                | 2530                            | 32                           | 10   | 18   |
| Field D                                | 2785                            | 45                           | 11   | 14   |
| Togo                                   | 631                             | 2                            | 1    | 6    |
| Tsukuba                                | 17                              | 1                            | 0    | 3    |
| Total                                  | 17615                           | 332                          | 75   | 136  |

<sup>a</sup>Sampled soils were used for cultivating tomato plants.

<sup>b</sup>Species complex to which each isolate belongs was inferred based on partial nucleotide sequence of EF-1 $\alpha$  gene.

FOSC, *F. oxysporum* species complex; FFSC, *F. fujikuroi* species complex; FSSC, *F. solani* species complex.

**Table 2.** Isolation of *Fusarium* directly from soils.

| Location of soil sampling | No. of isolates |      |      | Other <i>Fusarium</i> |
|---------------------------|-----------------|------|------|-----------------------|
|                           | FOSC            | FFSC | FSSC |                       |
| Field A                   | 40              | 1    | 22   | 1                     |
| Togo                      | 42              | 20   | 46   | 8                     |
| Total                     | 82              | 21   | 68   | 9                     |

and 19 June 2010. A total of 17 615 tomato plants were used. A total of 543 fusaria were isolated from 542 of the 17 615 plants (Tables 1 and S1, Supporting Information); two isolates (SL0006 and SL0008) were isolated from the same plant. A total of 180 soil isolates were obtained from field A (64 isolates) and Togo (116 isolates) (Tables 2 and S2, Supporting Information).

Phylogenetic relationships among the tomato isolates, the soil isolates and the reference strains were investigated by constructing a phylogenetic tree (data not shown). The tomato isolates belonged to the following three species complexes: FOSC (332 isolates), FFSC (75 isolates) and FSSC (136 isolates) (Table 1). Most soil isolates belonged to the FOSC (82 isolates), the FFSC (21 isolates) and the FSSC (68 isolates), but 9 isolates belonged to other species/species complexes (Table 2).

### Comparison of EF-1 $\alpha$ gene sequence types (EFSTs) among *Fusarium*

We divided *Fusarium* into EFSTs according to differences in nucleotide sequences of their EF-1 $\alpha$  genes. Fungi that belonged to the FOSC accounted for 21 EFSTs: 332 tomato isolates were divided into nine EFSTs and 82 soil isolates comprised five EFSTs (Fig. 1, Table 3). Five EFSTs (FOSC-01, 03, 04, 05 and 09) were commonly detected in isolates from both tomato plants and soil, four EFSTs (FOSC-02, 06, 07 and 08) were detected only in tomato and no EFSTs were detected only in soil (Fig. 1, Table 3). Two tomato pathogens, *F. oxysporum* f. sp. *lycopersici* (15 strains) and *F. oxysporum* f. sp. *radicis-lycopersici* (four strains) (Table S3, Supporting Information), were represented in the reference strains. Strains pathogenic to tomato contained three EFSTs (FOSC-03, 10 and 11); FOSC-03 was also found in tomato (Fig. 1). In other reference strains belonging to the FOSC, there were 21 pathogens (formae

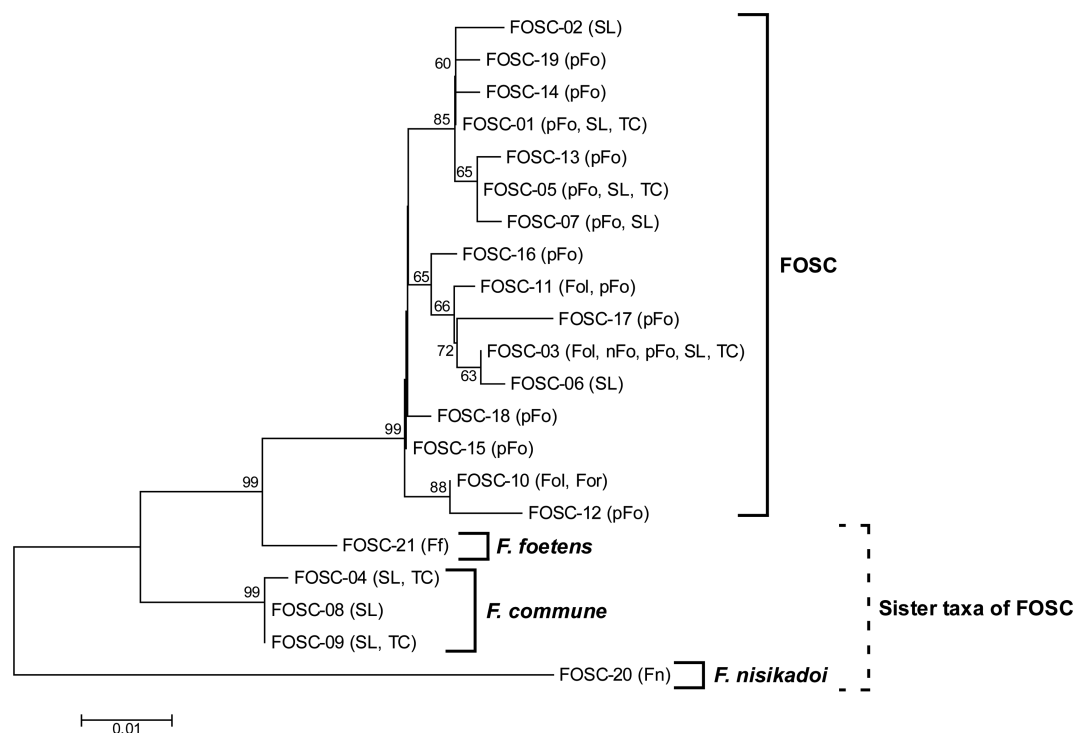

**Figure 1.** Neighbor-joining tree derived from 21 unique nucleotide sequences of the translation elongation factor 1 $\alpha$  (EF-1 $\alpha$ ) gene found in 477 isolates and reference strains belonging to the FOSC and its sister taxa, *F. commune*, *F. foetens* and *F. nisikadoi*. Distances were determined by the maximum composite likelihood. Scale bar indicates a distance of 0.01 (one base changes per 100 nucleotide positions). Values on the branches represent bootstrap support of 60% or greater based on 1000 replicates. A total of 21 unique sequences (EFSTs) are indicated by FOSC-01 to 21. Information on the isolates and reference strains in each EFST is shown in parentheses: SL, tomato isolates; TC, soil isolates; Ff, *F. foetens*; Fn, *F. nisikadoi*; Fol, *F. oxysporum* f. sp. lycopersici; For, *F. oxysporum* f. sp. radialis-lycopersici; nFo, non-pathogenic *F. oxysporum*; and pFo, plant pathogenic *F. oxysporum* belonging to other formae speciales except for lycopersici and radialis-lycopersici.

speciales *asparagi*, *batatas*, *conglutinans*, *cubense*, *cucumerinum*, *di-anthi*, *fragariae*, *gladioli*, *lactucae*, *lagenariae*, *matthiolae*, *melongena-e*, *melonis*, *momordicae*, *niveum*, *phaseoli*, *raphani*, *spinaciae* and *tulipae*; a strain pathogenic to *Paulownia tomentosa*; and a strain pathogenic to *Alnus pendula* (Table S3, Supporting Information). Of the 13 EFSTs found among these pathogens, 4 (EFST-01, 03, 05 and 07) were also found in tomato (Fig. 1). Of the 21 EFSTs, nucleotide sequences of the EF-1 $\alpha$  gene of 5 EFSTs (FOSC-06, 08, 12, 20 and 21) represented novel EFSTs (O'Donnell et al. 2009; Table 3).

Fungi that belonged to the FFSC were divided into 26 EFSTs: 75 tomato isolates were divided into seven EFSTs; and 21 soil isolates were placed in six EFSTs (Fig. 2, Table 4). Two EFSTs (FFSC-03 and 07) were detected in both tomato and soil, five EFSTs (FFSC-01, 02, 04, 05 and 06) were detected only in tomato and four EFSTs (FFSC-08 to 11) were detected only in soil (Fig. 2, Table 4). Best matching isolates by homology searches in the FUSARIUM-ID sequence database were also shown in Table 4. All EFSTs found among tomato and soil, except for FFSC-07 and 11, suggested they were *F. fractiflexum*, *F. fujikuroi* or *F. proliferatum* (Fig. 2). FFSC-07 was associated with 13 isolates and was found among tomato and soil; FFSC-11 was associated with only one isolate from soil (Table 4). The phylogenetic identity of FFSC-07 and 11 could not be inferred from this analysis (Fig. 2). The present result suggests that it might represent a new species.

Members of the FSSC were divided into 16 EFSTs: 136 tomato isolates were divided into 8 EFSTs, and 68 soil isolates were divided into 11 EFSTs (Table 5). Six EFSTs (FSSC-01, 03–06 and 08) were detected in tomato and soil, two EFSTs (FSSC-02 and 07) were detected only in tomato and five EFSTs (FSSC-09 to 13) were detected only in soil. No reference strains belonging to the FSSC

shared the same EFSTs detected in tomato and soil (Table 5). Of the 16 EFSTs, 9 (FSSC-01, 02, 07–09, 11 and 13–15) appeared to be new sequence types (O'Donnell et al. 2008a).

To add more FSSC reference strains, 27 EF sequences deposited in DDBJ/EMBL/GenBank were included in the phylogenetic analysis (Fig. 3, Table S4, Supporting Information). Of the thirteen EFSTs found in tomato and soil, seven were related to plant pathogens (Fig. 3): three EFSTs, FSSC-03, 08 and 10, related to pathogens of *Eustoma grandiflorum* (accession no. AB426618); three EFSTs, FSSC-01, 02 and 12, related to *F. solani* f. sp. radicola (AB513841); and one EFSTs, FSSC-13, related to *F. solani* f. sp. mori (FSSC-16, the reference strain MAFF 840046) and *F. solani* f. sp. pisi (AF1788337 and AF178355). The other six EFSTs, 04–07, 09 and 11, were not closely related to pathogens used in the present study.

Nine soil isolates that formed a clade (*F. tricinctum* species complex) were resolved as four EFSTs (Other-01 to 04): tomato isolates were not detected in these EFSTs (Fig. 4, Table 6).

### Inoculation and reisolation experiments using tomato and melon

To test for endophytic activity within tomato, and thus invasion ability, we performed inoculation and reisolation experiments using a total of 37 isolates and strains: 9 tomato isolates, 24 soil isolates, 1 tomato pathogen (*F. oxysporum* f. sp. lycopersici 880621a-1, a causal agent of vascular wilt disease of tomato), 1 melon pathogen (*F. oxysporum* f. sp. melonis Mel02010, a causal agent of vascular wilt disease of melon), 1 rice pathogen (*F. fujikuroi* AFM06–014A, a causal agent of bakanae disease) and 1 strain (*F. fujikuroi* MAFF 235151), of which pathogenicity was

Table 3. Identification of FOSC found in this study.

| EFST <sup>a</sup> | Number of isolates/strains |      |           | Plant pathogens involved in the reference strains <sup>b</sup>                                                                                                                                                                                                                                                                                                                       | Isolate/strain          | Representative             |                       | Identical EF sequence type (ST) of <i>F. oxysporum</i> species complex (O'Donnell et al. 2009)                                                               |
|-------------------|----------------------------|------|-----------|--------------------------------------------------------------------------------------------------------------------------------------------------------------------------------------------------------------------------------------------------------------------------------------------------------------------------------------------------------------------------------------|-------------------------|----------------------------|-----------------------|--------------------------------------------------------------------------------------------------------------------------------------------------------------|
|                   | Tomato                     | Soil | Reference |                                                                                                                                                                                                                                                                                                                                                                                      |                         | Accession no. <sup>c</sup> | MAFF no. <sup>d</sup> |                                                                                                                                                              |
| FOSC-01           | 239                        | 56   | 7         | Cucumber pathogen (f. sp. <i>cucumerinum</i> ), Melon pathogen (f. sp. <i>melonis</i> ), Common bean pathogen (f. sp. <i>phaseoli</i> ), <i>Alnus pendula</i> pathogen (f. sp. is not identified)                                                                                                                                                                                    | SL0001                  | AB916973                   | 244588                | ST11, ST20, ST47, ST68, ST73, ST81, ST171, ST204, ST247                                                                                                      |
| FOSC-02           | 5                          | 0    | 0         | None                                                                                                                                                                                                                                                                                                                                                                                 | SL0014                  | AB916974                   | 244591                | ST224                                                                                                                                                        |
| FOSC-03           | 42                         | 3    | 13        | Sweet potato pathogen (f. sp. <i>bataatas</i> ), Tomato pathogen (f. sp. <i>lycopersici</i> )                                                                                                                                                                                                                                                                                        | SL0019                  | AB916975                   | 244594                | ST7, ST16, ST40, ST44, ST48, ST53, ST55, ST59, ST79, ST112, ST113, ST114, ST122, ST130, ST142, ST150, ST157, ST215, ST217, ST232, ST238, ST240, ST244, ST256 |
| FOSC-04           | 2                          | 4    | 0         | None                                                                                                                                                                                                                                                                                                                                                                                 | SL0021                  | AB916976                   | 244595                | ST3, ST27, ST31, ST35, ST64, ST66, ST67, ST76, ST82, ST84, ST85, ST86, ST174, ST181, ST208, ST227, ST241, ST243                                              |
| FOSC-05           | 29                         | 18   | 13        | Cucumber pathogen (f. sp. <i>cucumerinum</i> ), Strawberry pathogen (f. sp. <i>fragariae</i> ), Lettuce pathogen (f. sp. <i>lactucaae</i> ), Bottle gourd pathogen (f. sp. <i>lagenariae</i> ), Melon pathogen (f. sp. <i>melonis</i> ), Bitter melon pathogen (f. sp. <i>momordicae</i> ), Watermelon pathogen (f. sp. <i>niveum</i> ), Spinach pathogen (f. sp. <i>spinaciae</i> ) | SL0035                  | AB916977                   | 244599                |                                                                                                                                                              |
| FOSC-06           | 1                          | 0    | 0         | None                                                                                                                                                                                                                                                                                                                                                                                 | SL0041                  | AB916978                   | 244600                | None                                                                                                                                                         |
| FOSC-07           | 12                         | 0    | 1         | An empress tree pathogen (f. sp. was not identified)                                                                                                                                                                                                                                                                                                                                 | SL0054                  | AB916979                   | 244601                | ST187                                                                                                                                                        |
| FOSC-08           | 1                          | 0    | 0         | None                                                                                                                                                                                                                                                                                                                                                                                 | SL0350                  | AB916980                   | 244605                | None                                                                                                                                                         |
| FOSC-09           | 1                          | 1    | 0         | None                                                                                                                                                                                                                                                                                                                                                                                 | SL0580                  | AB916981                   | 244610                | ST164, ST180, ST182                                                                                                                                          |
| FOSC-10           | 0                          | 0    | 6         | Tomato pathogens (ff. sp. <i>lycopersici</i> and <i>radicis-lycopersici</i> )                                                                                                                                                                                                                                                                                                        | Reference strain CU1    | AB916982                   | Not deposited         | ST63, ST168, ST199, ST207                                                                                                                                    |
| FOSC-11           | 0                          | 0    | 4         | Asparagus pathogen (f. sp. <i>asparagi</i> ), Tomato pathogen (f. sp. <i>lycopersici</i> )                                                                                                                                                                                                                                                                                           | Reference strain GF1022 | AB916983                   | Not deposited         | ST21, ST51, ST56, ST75, ST83, ST161, ST216, ST245                                                                                                            |

Table 3. continued

| EFST <sup>a</sup>                  | Number of isolates/strains |      | Plant pathogens involved in the reference strains <sup>b</sup> | Representative        |           | Identical EF sequence type (ST) of <i>F. oxysporum</i> species complex (O'Donnell et al. 2009) |                                                                                                                                                                                                                      |
|------------------------------------|----------------------------|------|----------------------------------------------------------------|-----------------------|-----------|------------------------------------------------------------------------------------------------|----------------------------------------------------------------------------------------------------------------------------------------------------------------------------------------------------------------------|
|                                    | Tomato                     | Soil |                                                                | Reference             | Reference |                                                                                                | Accession no. <sup>c</sup>                                                                                                                                                                                           |
| FOSC-12                            | 0                          | 0    | 7                                                              | Reference strain      | AB916984  | 103047                                                                                         | None                                                                                                                                                                                                                 |
| FOSC-13                            | 0                          | 0    | 2                                                              | Reference strain      | AB916985  | 103051                                                                                         | ST4                                                                                                                                                                                                                  |
| FOSC-14                            | 0                          | 0    | 1                                                              | Reference strain      | AB916986  | 103057                                                                                         | ST2, ST4, ST19, ST28, ST29, ST32, ST37, ST42, ST50, ST65, ST71, ST87, ST88, ST89, ST90, ST101, ST110, ST117, ST133, ST151, ST159, ST169, ST170, ST176, ST188, ST189, ST190, ST191, ST194, ST196, ST210, ST254, ST255 |
| FOSC-15                            | 0                          | 0    | 1                                                              | Reference strain      | AB916987  | 103072                                                                                         | ST46                                                                                                                                                                                                                 |
| FOSC-16                            | 0                          | 0    | 2                                                              | Reference strain      | AB916988  | 235105                                                                                         | ST13, ST22, ST30, ST80, ST106, ST144, ST220, ST223                                                                                                                                                                   |
| FOSC-17                            | 0                          | 0    | 1                                                              | Reference strain      | AB916989  | 305610                                                                                         | ST12, ST92, ST93, ST104, ST146, ST148, ST155, ST246                                                                                                                                                                  |
| FOSC-18                            | 0                          | 0    | 1                                                              | Reference strain      | AB916990  | 306716                                                                                         | ST25                                                                                                                                                                                                                 |
| FOSC-19                            | 0                          | 0    | 1                                                              | Reference strain YU-1 | AB916991  | Not deposited                                                                                  | ST11, ST20, ST26, ST45, ST47, ST68, ST72, ST73, ST81, ST107, ST149, ST171, ST184, ST204, ST221, ST225, ST230, ST247, ST252                                                                                           |
| FOSC-20<br>( <i>F. nisikadoi</i> ) | 0                          | 0    | 1                                                              | Reference strain      | AB916992  | 237507                                                                                         | None                                                                                                                                                                                                                 |
| FOSC-21<br>( <i>F. foetens</i> )   | 0                          | 0    | 2                                                              | Reference strain      | AB916993  | 240179                                                                                         | None                                                                                                                                                                                                                 |
| Total                              | 332                        | 82   | 63                                                             |                       |           |                                                                                                |                                                                                                                                                                                                                      |

<sup>a</sup>EF-1 $\alpha$  gene sequence type.<sup>b</sup>Forma specialis (f. sp.) was indicated in parentheses.<sup>c</sup>DDb/EMBL/GenBank accession number.<sup>d</sup>MAFF genebank system number, National Institute of Agrobiological Sciences, Tsukuba, Japan.

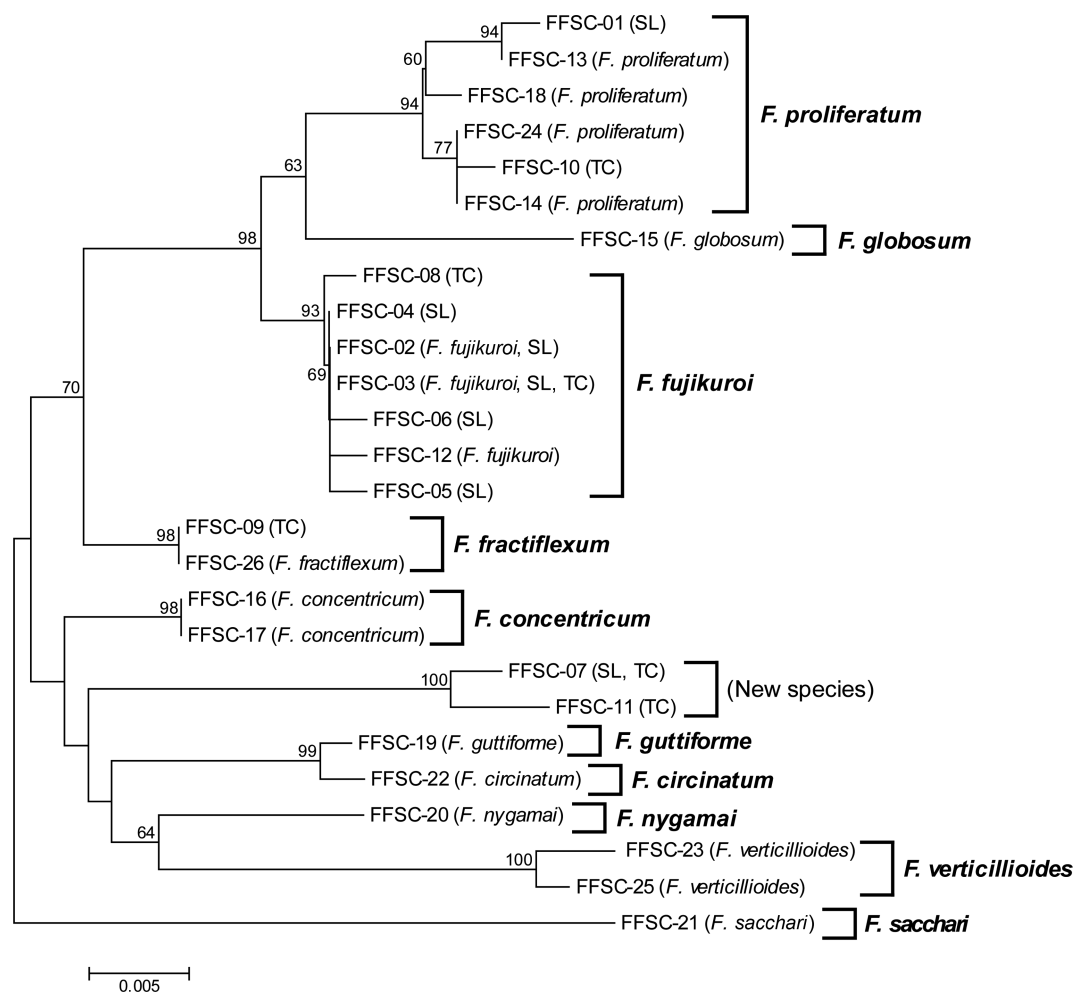

**Figure 2.** Neighbor-joining tree derived from 26 EFSTs found in 120 isolates and reference strains belonging to the FFSC. Distances were determined by the maximum composite likelihood. Values on the branches represent bootstrap support of 60% or greater based on 1000 replicates. The 26 unique sequences (EFTS) are indicated by FFSC-01 to 26. Information on the isolates and reference strains in each EFST is shown in parentheses: SL, tomato isolates; TC, soil isolates.

unknown. These experiments were conducted seven different times: the first and second experiments used tomato isolates and plant pathogenic strains belonging to the FOSC; the third to fifth mainly used soil isolates; the sixth used soil isolates belonging to the FSSC; and the seventh used soil isolates belonging to the FFSC. All isolates and strains used were reisolated from surface-sterilized tomato stems except for soil isolate TC0058 (Table 7). Inoculation and reisolation experiments with melon were also performed using seven tomato isolates and two reference strains (one melon pathogen and one tomato pathogen). All isolates and strains used were reisolated from surface-sterilized melon stems (Table 8). In these experiments, wilt symptoms were not induced by any of the tomato and soil isolates tested. These experiments were performed several times in an air-conditioned greenhouse. However, the reisolation frequency appeared to be affected by factors other than temperature, such as day length or the strength of sunlight.

## DISCUSSION

*Fusaria* have been targeted in a large number of research studies in areas such as disease control, ecology, methods and techniques, pathogenicity and taxonomy (Leslie and Summerell

2006). Development of media for specific isolation of *Fusaria* is an important achievement. Well-known selective media include Nash and Snyder medium and its derivatives such as Komada's medium (Nash and Snyder 1962; Komada 1975), malachite green agar (Castellá et al. 1997) and selective *Fusarium* agar (Burgess et al. 1988). Nash and Snyder medium and its derivatives contain pentachloronitrobenzene (PCNB). In 2007, two derivatives of Komada's medium were developed for isolating *F. oxysporum*. These media (Fo-G1 and Fo-G2) do not contain PCNB (Nishimura 2007). Our initial objective in the present study was to characterize FOSC endophytes within tomato stems phylogenetically. We used Fo-G1 medium and easily isolated *Fusaria* belonging to the FFSC and FSSC in addition to FOSC. These results were consistent with those of Nishimura (2007), in which FFSC and FSSC strains could grow on Fo-G1 medium. We isolated FOSC more frequently from tomato than members of the other two species complexes. In other studies on *Fusarium* endophytes in roots and basal stems, FOSC was also reported as the dominant dweller in those habitats (Windels and Kommedahl 1974; Helbig and Carroll 1984; Gordon, Okamoto and Jacobson 1989). These results suggest that members of the FOSC were more compatible with plants tested or were more prevalent in the soils than those of the FFSC and FSSC.

Table 4. Identification of FFSC found in this study.

| FFST    | Number of isolates/strains |                 | Plant pathogens involved in the reference strains | Representative                                      |          | Best matching (FUSARIUM-ID) |               |          | Best matching (DDB/EMBL/GenBank) |         |                | Species inferred |               |                        |
|---------|----------------------------|-----------------|---------------------------------------------------|-----------------------------------------------------|----------|-----------------------------|---------------|----------|----------------------------------|---------|----------------|------------------|---------------|------------------------|
|         | Tomato                     | Soil            |                                                   | Accession no.                                       | MAFF no. | Isolate strain              | Accession no. | MAFF no. | Isolate ID                       | E-value | Identities (%) |                  | Accession no. | E-value                |
| FFSC-01 | 1                          | 0               | 0                                                 | SL0018                                              | AB916994 | 244593                      | FD.01379      | 0        | 99.25                            | 0       | KM873334       | 0                | 99.75         | <i>F. proliferatum</i> |
| FFSC-02 | 3                          | 0               | 1                                                 | SL0031                                              | AB916995 | 244597                      | FD.01857      | 0        | 99.74                            | 0       | HQ622556       | 0                | 100           | <i>F. fujikuroi</i>    |
| FFSC-03 | 50                         | 5               | 1                                                 | SL0033                                              | AB916996 | 244598                      | FD.01857      | 0        | 100                              | 0       | LC009439       | 0                | 100           | <i>F. fujikuroi</i>    |
| FFSC-04 | 12                         | 0               | 0                                                 | SL0089                                              | AB916997 | 244602                      | FD.01857      | 0        | 99.74                            | 0       | JN695744       | 0                | 99.75         | <i>F. fujikuroi</i>    |
| FFSC-05 | 7                          | 0               | 0                                                 | SL0273                                              | AB916998 | 244603                      | FD.01857      | 0        | 99.74                            | 0       | LC009439       | 0                | 99.75         | <i>F. fujikuroi</i>    |
| FFSC-06 | 1                          | 0               | 0                                                 | SL0293                                              | AB916999 | 244604                      | FD.01857      | 0        | 99.74                            | 0       | LC009439       | 0                | 99.75         | <i>F. fujikuroi</i>    |
| FFSC-07 | 1                          | 12 <sup>a</sup> | 0                                                 | SL0584                                              | AB917000 | 244611                      | FD.01762      | 0        | 100                              | 0       | AF160306       | 0                | 100           | n.i. <sup>b</sup>      |
| FFSC-08 | 0                          | 1               | 0                                                 | TC0066                                              | AB917001 | 244617                      | FD.01857      | 0        | 99.74                            | 0       | LC009439       | 0                | 99.75         | <i>F. fujikuroi</i>    |
| FFSC-09 | 0                          | 1               | 0                                                 | TC0083                                              | AB917002 | 244619                      | FD.01162      | 0        | 100                              | 0       | AB917019       | 2E-165           | 94.26         | <i>F. fractiflexum</i> |
| FFSC-10 | 0                          | 1               | 0                                                 | TC0089                                              | AB917003 | 244620                      | FD.01389      | 0        | 100                              | 0       | KC808223       | 0                | 100           | <i>F. proliferatum</i> |
| FFSC-11 | 0                          | 1               | 0                                                 | TC0108                                              | AB917004 | 244625                      | FD.01151      | 0        | 99.74                            | 0       | AF160303       | 0                | 99.75         | n.i.                   |
| FFSC-12 | 0                          | 0               | 2                                                 | Reference strain AFM06-014A ( <i>F. fujikuroi</i> ) | AB917005 | Not deposited               | -             | -        | -                                | -       | -              | -                | -             | -                      |
| FFSC-13 | 0                          | 0               | 2                                                 | Reference strain (F. proliferatum)                  | AB917006 | 236459                      | -             | -        | -                                | -       | -              | -                | -             | -                      |
| FFSC-14 | 0                          | 0               | 1                                                 | Reference strain (F. proliferatum)                  | AB917007 | 236871                      | -             | -        | -                                | -       | -              | -                | -             | -                      |
| FFSC-15 | 0                          | 0               | 1                                                 | Reference strain (F. globosum)                      | AB917008 | 237511                      | -             | -        | -                                | -       | -              | -                | -             | -                      |
| FFSC-16 | 0                          | 0               | 1                                                 | Reference strain (F. concentricum)                  | AB917009 | 237649                      | -             | -        | -                                | -       | -              | -                | -             | -                      |
| FFSC-17 | 0                          | 0               | 1                                                 | Reference strain (F. concentricum)                  | AB917010 | 237650                      | -             | -        | -                                | -       | -              | -                | -             | -                      |
| FFSC-18 | 0                          | 0               | 1                                                 | Reference strain (F. proliferatum)                  | AB917011 | 238030                      | -             | -        | -                                | -       | -              | -                | -             | -                      |
| FFSC-19 | 0                          | 0               | 2                                                 | Reference strain (F. guttiforme)                    | AB917012 | 239055                      | -             | -        | -                                | -       | -              | -                | -             | -                      |
| FFSC-20 | 0                          | 0               | 2                                                 | Reference strain (F. nygamai)                       | AB917013 | 239069                      | -             | -        | -                                | -       | -              | -                | -             | -                      |
| FFSC-21 | 0                          | 0               | 1                                                 | Reference strain (F. sacchari)                      | AB917014 | 239074                      | -             | -        | -                                | -       | -              | -                | -             | -                      |
| FFSC-22 | 0                          | 0               | 3                                                 | Reference strain (F. circinatum)                    | AB917015 | 239425                      | -             | -        | -                                | -       | -              | -                | -             | -                      |
| FFSC-23 | 0                          | 0               | 1                                                 | Reference strain (F. verticilloides)                | AB917016 | 240087                      | -             | -        | -                                | -       | -              | -                | -             | -                      |
| FFSC-24 | 0                          | 0               | 2                                                 | Reference strain (F. proliferatum)                  | AB917017 | 410715                      | -             | -        | -                                | -       | -              | -                | -             | -                      |
| FFSC-25 | 0                          | 0               | 1                                                 | Reference strain (F. verticilloides)                | AB917018 | 511481                      | -             | -        | -                                | -       | -              | -                | -             | -                      |
| FFSC-26 | 0                          | 0               | 1                                                 | Reference strain (F. fractiflexum)                  | AB917019 | 237530                      | -             | -        | -                                | -       | -              | -                | -             | -                      |
| Total   | 75                         | 21              | 24                                                | -                                                   | -        | -                           | -             | -        | -                                | -       | -              | -                | -             | -                      |

<sup>a</sup>Eleven of the 12 isolates were deposited in the NIAS Genebank (MAFF 244613 to 244616, 244623, 244624, 244625, 244626, 244627, 244629 to 244631).

<sup>b</sup>n.i., species could not be determined.



Table 5. Identification of FSSC found in this study.

| EFST    | Number of isolates/strains |      | Plant pathogens involved in the reference strain | Representative   |                        | Identical multilocus sequence type (MLST) of <i>F. solani</i> species complex (O'Donnell et al. 2008a) | Phylogenetically distinct species inferred <sup>a</sup> |
|---------|----------------------------|------|--------------------------------------------------|------------------|------------------------|--------------------------------------------------------------------------------------------------------|---------------------------------------------------------|
|         | Tomato                     | Soil |                                                  | Isolate/strain   | Accession no. MAFF no. |                                                                                                        |                                                         |
| FSSC-01 | 40                         | 11   | 0                                                | SL0002           | AB917020               | None                                                                                                   | 5                                                       |
| FSSC-02 | 3                          | 0    | 0                                                | SL0009           | AB917021               | None                                                                                                   | 5                                                       |
| FSSC-03 | 37                         | 24   | 0                                                | SL0016           | AB917022               | 5-c, 5-e, 5-f, 5-n, 5-d, 5-a                                                                           | 5                                                       |
| FSSC-04 | 33                         | 19   | 0                                                | SL0028           | AB917023               | 3+4-ddd, 3+4-ii, 3+4-mn, 3+4-tr                                                                        | 3+4                                                     |
| FSSC-05 | 11                         | 3    | 0                                                | SL0419           | AB917024               | 3+4-i, 3+4-z                                                                                           | 3+4                                                     |
| FSSC-06 | 8                          | 2    | 0                                                | SL0460           | AB917025               | 3+4-k, 3+4-x, 3+4-y                                                                                    | 3+4                                                     |
| FSSC-07 | 3                          | 0    | 0                                                | SL0465           | AB917026               | None                                                                                                   | 3+4                                                     |
| FSSC-08 | 1                          | 2    | 0                                                | SL0573           | AB917027               | None                                                                                                   | 5                                                       |
| FSSC-09 | 0                          | 2    | 0                                                | TC0068           | AB917028               | None                                                                                                   | 3+4                                                     |
| FSSC-10 | 0                          | 2    | 0                                                | TC0095           | AB917029               | 5-h                                                                                                    | 5                                                       |
| FSSC-11 | 0                          | 1    | 0                                                | TC0157           | AB917030               | None                                                                                                   | 11 or 17                                                |
| FSSC-12 | 0                          | 1    | 0                                                | TC0159           | AB917031               | 5-g                                                                                                    | 5                                                       |
| FSSC-13 | 0                          | 1    | 0                                                | TC0163           | AB917032               | None                                                                                                   | 11                                                      |
| FSSC-14 | 0                          | 0    | 1                                                | Reference strain | AB917033               | None                                                                                                   | 21                                                      |
| FSSC-15 | 0                          | 0    | 1                                                | Reference strain | AB917034               | None                                                                                                   | <i>F. cuneirostrum</i>                                  |
| FSSC-16 | 0                          | 0    | 1                                                | Reference strain | AB917035               | 11-a                                                                                                   | 11                                                      |
| Total   | 136                        | 68   | 4                                                | -                | -                      | -                                                                                                      | -                                                       |

<sup>a</sup>Phylogenetically distinct species shown in O'Donnell et al. (2008a) was inferred based on maximum parsimony and maximum likelihood tree analyses using MEGA5.

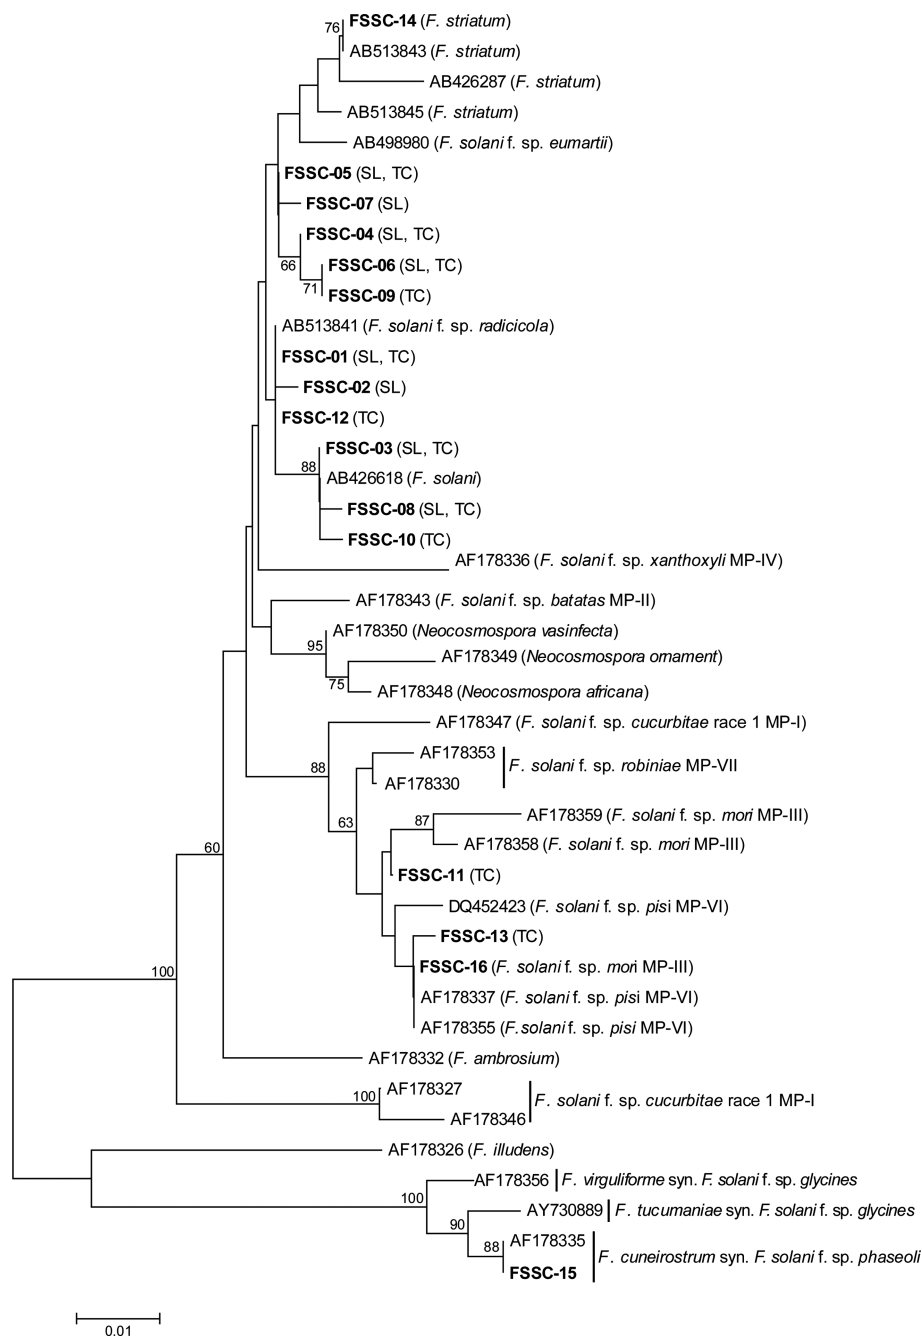

**Figure 3.** Neighbor-joining tree derived from 42 EFSTs found in 242 isolates, reference strains and database strains, of which EF sequences were deposited in DDBJ/EMBL/GenBank, belonging to the FSSC. Distances were determined by the maximum composite likelihood. Values on the branches represent bootstrap support of 60% or greater based on 1000 replications. A total of 42 unique sequences are indicated by FSSC-01 to 16 (original isolates in this study and reference strains) or DDBJ/EMBL/GenBank accession numbers (database strains). Information on the isolates, reference strains and database strains involved in each unique sequence is shown in parentheses: SL, tomato isolate(s); TC, soil isolate(s).

Tomato is a source of *Fusarium* endophytes. *Fusarium incarnatum*/*F. equiseti* species complex (Gordon, Okamoto and Jacobson 1989), FOSC (Gordon, Okamoto and Jacobson 1989; Hallman and Sikora 1994; Kim et al. 2007) and FSSC (Gordon, Okamoto and Jacobson 1989; Kavroulakis et al. 2007) endophytes have been obtained from tomato. The three *Fusarium* groups are widely distributed in the world (Backhouse, Burgess and Summerell 2001). We obtained FSSC endophytes in addition to FOSC and FSSC endophytes from tomato but did not isolate *F. equiseti*.

Fo-G1 medium might not be suitable for the growth of *F. equiseti*, or this fungus may be absent or present in too low number in the soils we used. To obtain *Fusarium* endophytes from tomato, we used a total of 17 615 tomato stems. From the 17 615 stems, 543 *Fusarium* endophytes were isolated (the proportion of stems from which fusaria were isolated was 0.031). Two isolates, SL0006 and SL0008, were obtained from the same stem and shared the same EFST. Thus, SL0006 and SL0008 might be clones. Kim et al. (2007) showed that the isolation frequency of

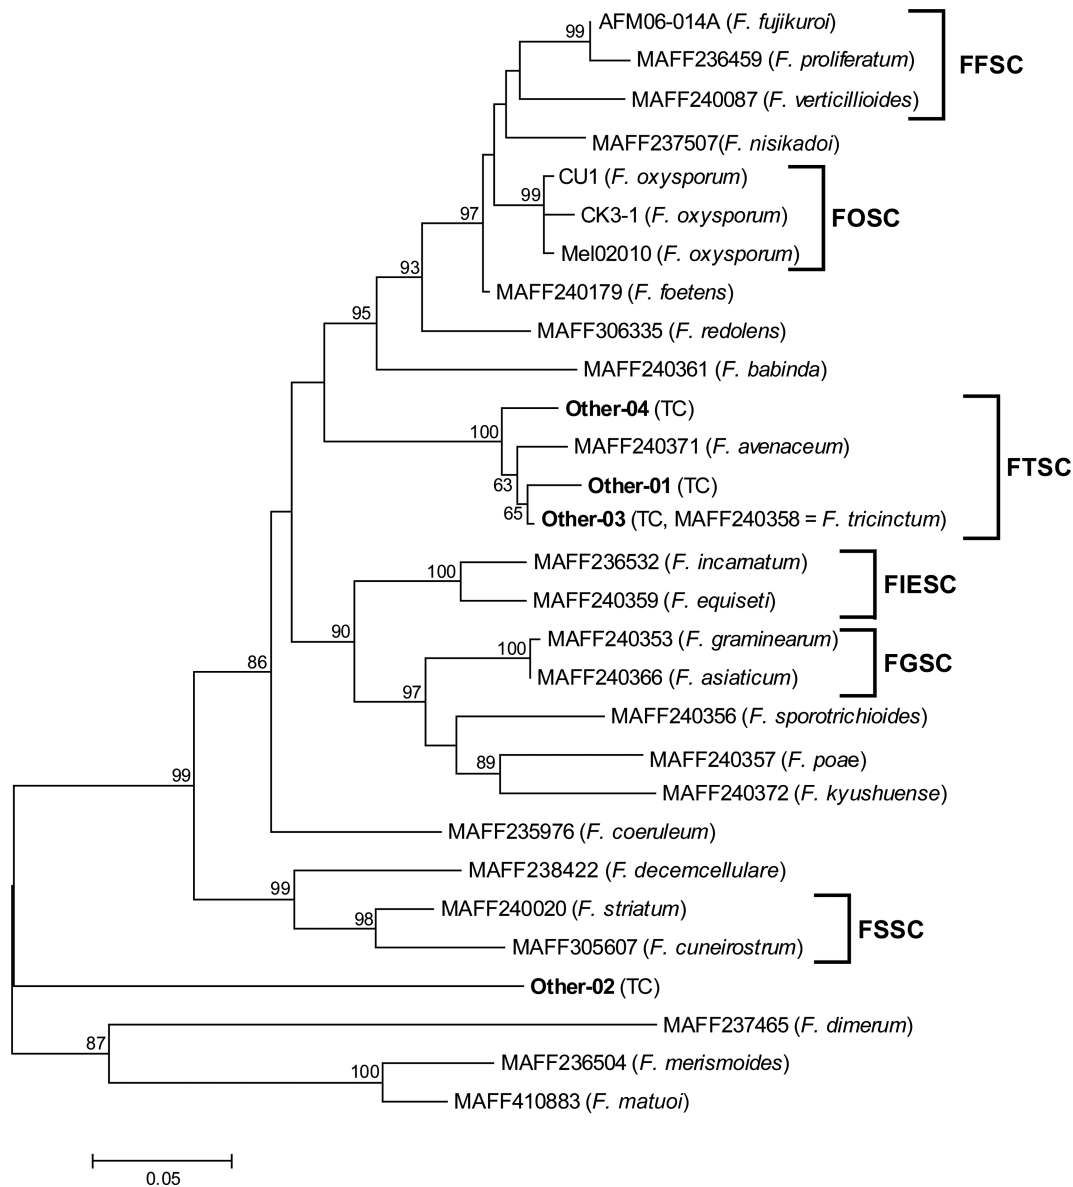

**Figure 4.** Neighbor-joining tree derived from 25 EFSTs found in reference strains and four EFSTs found in soil isolates belonging to species other than the FOSC, FFSC and FSSC. Distances were determined by the maximum composite likelihood. Values on the branches represent bootstrap support of 60% or greater based on 1000 replications. The 29 unique sequences are indicated by Other-01 to 04 and strain names. Information on the isolates and reference strains in each sequence is shown in parentheses: TC, soil isolates. FGSC, *F. graminearum* species complex; FIESC, *F. incarnatum*/*F. equiseti* species complex; FTSC, *F. tricinctum* species complex.

fungal endophytes from stems was lower than from roots. These results were inferred using five crops including tomato. Thus, if we had also isolated *Fusarium* endophytes from tomato roots, we might have obtained endophytes at a higher frequency than from stems.

We expected that the inoculation and reisolation experiments might reveal the degree of compatibility of fusaria with plants. In the experiments with tomato, tomato isolates SL0301, SL0303, SL0316 and SL0321 showed the high reisolation frequencies. These isolates were obtained from the same field and had the same EFST (FOSC-03). Thus, these isolates may be clones. Two significant results were apparent (Table 7). First, there were differences in the reisolation frequency among isolates. For example, the reisolation frequency of isolate SL0300 (0.267) was significantly higher than that of isolate TC0003 (0.008). Second,

most soil isolates used in the experiments were also reisolated from tomato stems, with the exception of isolate TC0058. These two results suggested that the frequency of invasion of tomato stems differed among isolates and that most *Fusarium* isolates have the ability to invade tomato stems. Tomato isolates also showed the ability to invade melon (Table 8). Therefore, the results supported our hypothesis that *Fusarium* may be compatible with a broad range of plants, especially those especially in the FOSC.

As described in the section ‘Results’, a new species within the FFSC was suggested based on phylogenetic analysis of the EF-1 $\alpha$  gene and searches of the FUSARIUM-ID database. The nucleotide sequences of the EF-1 $\alpha$  genes of EFSTs FFSC-07 and 11 were almost identical to those of *Fusarium* sp. NRRL 26152 (isolate ID = FD.01762) and *Fusarium* sp. NRRL 26061 (FD.01151),

**Table 6.** Identification of other *Fusarium* species.

| EFST     | Number of isolates/strains |      |           | Representative |               |          | Best matching (FUSARIUM-ID) |         |                |                              |
|----------|----------------------------|------|-----------|----------------|---------------|----------|-----------------------------|---------|----------------|------------------------------|
|          | Tomato                     | Soil | Reference | Isolate        | Accession no. | MAFF no. | Isolate ID                  | E-value | Identities (%) | Species inferred             |
| Other-01 | 0                          | 6    | 0         | TC0021         | AB917036      | 244612   | FD_01726                    | 0       | 100            | <i>F. acuminatum</i> (FTSC)  |
| Other-02 | 0                          | 1    | 0         | TC0093         | AB917037      | 244621   | FD_00943                    | 6e-34   | 97.43          | Unknown                      |
| Other-03 | 0                          | 1    | 1         | TC0126         | AB917038      | 244628   | FD_01324                    | 0       | 97.35          | Unknown                      |
| Other-04 | 0                          | 1    | 0         | TC0265         | AB917039      | 244635   | FD_01846                    | 0       | 100            | <i>F. flocciferum</i> (FTSC) |

FTSC, *F. tricinctum* species complex.

respectively. These strains were reported as a new, distinct species in an exhaustive phylogenetic analysis of the FFSC on the basis of nucleotide sequencing of six loci including the EF-1 $\alpha$  gene (O'Donnell et al. 2000). NRRL 26152 and NRRL 26061 were initially reported in the year 2000. However, these strains have not been analyzed further phylogenetically or morphologically and have not been described as a new species because there are no strains closely related to them. However, our nucleotide sequence analysis of the EF-1 $\alpha$  gene revealed that 14 isolates obtained from tomato and soil are closely related to NRRL 26152 and NRRL 26061. Thus, this set of isolates may be suitable for further characterizing this putatively novel *Fusarium*.

The FOSC has not been reclassified based on molecular phylogenetic and morphological traits. When analysis of these traits is finished, this complex very likely will be divided into more than one species. Two species, *F. foetens* (Schroers et al. 2004) and *F. nisikadoi* (Nirenberg and Aoki 1997; Aoki 2009), were identified based on comparison with *F. oxysporum*. Because the molecular phylogenetic traits of *F. foetens* and *F. nisikadoi* are closely related to *F. oxysporum*, they were reported as a member of or a sister taxon of the *F. oxysporum* species complex (Schroers et al. 2004; Aoki 2009). As a matter of practical convenience, we describe the two species in the FOSC. In Fig. 1, *F. oxysporum* pathogens, *F. oxysporum* biological control agents, *F. foetens* and *F. nisikadoi* were used as references. The phylogenetic position of FOSC-04 (six isolates), FOSC-08 (one isolate) and FOSC-09 (two isolates) was not closely related to *F. oxysporum* pathogens or biological control agents. Furthermore, these three EFSTs were obviously different from *F. foetens* and *F. nisikadoi*. BLAST searches of FUSARIUM-ID indicated that they are conspecific with *F. commune* NRRL 28058 (isolate ID = FD.01065; e-values = 0; and identities = 99.23 to 100%). This species is also relatively newly defined; it was first described in 2003 (Skovgaard et al. 2003).

We used 27 EF-1 $\alpha$  gene sequences of the *F. solani* species complex from the DDBJ/EMBL/GenBank databases in addition to three reference strains within the FSSC in our molecular phylogenetic analysis. However, EFSTs FSSC-04 (52 isolates), FSSC-05 (14 isolates), FSSC-06 (10 isolates), FSSC-07 (3 isolates) and FSSC-09 (2 isolates) were not closely related to these reference strains, as shown in Fig. 3. We thus compared the nucleotide sequences of the five EFSTs with the sequences registered in the DDBJ/EMBL/GenBank databases. Sequences of five EFSTs respectively had high similarity with the nucleotide sequences of the EF-1 $\alpha$  genes of reported NRRL strains 44906 (multilocus sequence type 3+4-lll), 52680 (3+4-mmm), 52832 (3+4-nnn), 53120 (3+4-ooo) and 53128 (3+4-ppp). These NRRL strains were presented in Migheli et al. (2010). The sequence identities were 99–100% between our isolates and the five NRRL strains. These NRRL strains were isolated from patients (toe, blood or cerebrospinal fluid). The five EFSTs found in our isolates also had a close relationship with four field isolates reported by Jiménez-Fernández

et al. (2011) and two field isolates reported in Nitschke, Nihlgard and Varrelmann (2009). The four isolates of Jiménez-Fernández et al. (2011; cc20B, cc61C, cc41W and cc40A) were obtained from surface-sterilized stems of chickpea plants displaying *Fusarium* yellows (wilting syndrome); the two isolates of Nitschke, Nihlgard and Varrelmann (2009; sol-17 and sol-61) were obtained from surface-sterilized roots of sugar beets displaying root rot symptoms. Pathogenicity of the six isolates was not confirmed in the two reports, so we do not know whether plant pathogens were included in this phylogenetic group.

Molecular phylogenetic relationships between plant pathogenic and non-pathogenic *Fusarium* strains have been studied (Baayen et al. 2000; Bao et al. 2002; Fourie et al. 2009). However, pathogenic strains were not distinct from non-pathogenic strains based on molecular phylogenetic traits. These results were supported by studies on the molecular mechanisms of pathogenicity: accessory chromosomes that could have mobility to other strains and thus be able to confer pathogenicity to *F. oxysporum* (Ma et al. 2010). On the basis of molecular phylogenetic analyses, some tomato and soil isolates we obtained were closely related to plant pathogens. For example, the EFST FOSC-03 included tomato and sweet potato wilt pathogens (*F. oxysporum* f. sp. *lycopersici* and *F. oxysporum* f. sp. *batatas*) in addition to tomato and soil isolates. As described above, this does not imply that these tomato and soil isolates were pathogenic. To be sure of their pathogenicity, it will be necessary to perform inoculation assays.

Biological control activity of non-pathogenic fusaria against *Fusarium* wilts has been reported since the 1980s (Ogawa and Komada 1984; Schneider 1984). Some *Fusarium* strains used for biological control could invade tomato stems (Amemiya, Koike and Hirano 1989; Hallman and Sikora 1994; Shishido et al. 2005). However, the relationship between their endophytic behavior and their biological control activity has not yet been revealed. Molecular characterization of the endophytic and biological control mechanisms of *Fusarium*, especially at the molecular level (Massart and Jijakli 2007), will be the next research target. If these mechanisms are identified, we may be able to develop new approaches and technologies for protecting plants from diseases. To accomplish our aim, we are now trying to screen isolates that can effectively control *Fusarium* wilt diseases and are also trying to develop a new disease control method using one of the isolates in the field. Our goal is to analyze biological control of *Fusarium* at the molecular level to improve this method of disease control.

## SUPPLEMENTARY DATA

Supplementary data are available at FEMSEC online.

**Table 7.** Inoculation and reisolation of *Fusarium* strains from tomato plants<sup>a</sup>.

| Isolate strain              | EFST    | Species complex (species)          | Exp. 1 |    | Exp. 2 |    | Exp. 3 |   | Exp. 4 |    | Exp. 5 |    | Exp. 6 |   | Exp. 7 |     | Total |       |            |
|-----------------------------|---------|------------------------------------|--------|----|--------|----|--------|---|--------|----|--------|----|--------|---|--------|-----|-------|-------|------------|
|                             |         |                                    | T      | D  | T      | D  | T      | D | T      | D  | T      | D  | T      | D | T      | D   | T     | D     | Proportion |
| SL0303                      | FOSC-03 | <i>F. oxysporum</i>                | 19     | 19 | -      | -  | -      | - | -      | -  | -      | -  | -      | - | -      | -   | 19    | 19    | 1.000      |
| SL0301                      | FOSC-03 | <i>F. oxysporum</i>                | 20     | 18 | -      | -  | -      | - | -      | -  | -      | -  | -      | - | -      | -   | 20    | 18    | 0.900      |
| SL0321                      | FOSC-03 | <i>F. oxysporum</i>                | 20     | 16 | -      | -  | -      | - | -      | -  | -      | -  | -      | - | -      | -   | 20    | 16    | 0.800      |
| SL0316                      | FOSC-03 | <i>F. oxysporum</i>                | 19     | 13 | -      | -  | -      | - | -      | -  | -      | -  | -      | - | -      | -   | 19    | 13    | 0.684      |
| 880621a-1 (Tomato pathogen) | FOSC-03 | <i>F. oxysporum</i>                | -      | -  | 20     | 11 | -      | - | -      | -  | -      | -  | -      | - | -      | -   | 20    | 11    | 0.550      |
| SL0317                      | FOSC-03 | <i>f. sp. lycopersici</i>          | 19     | 7  | -      | -  | -      | - | -      | -  | -      | -  | -      | - | -      | -   | 19    | 7     | 0.368      |
| TC0289                      | FFSC-03 | <i>F. fujikuroi</i>                | -      | -  | -      | -  | -      | - | -      | -  | -      | -  | -      | - | 70     | 25  | 70    | 25    | 0.357      |
| TC0100                      | FFSC-03 | <i>(F. fujikuroi)</i>              | -      | -  | -      | -  | -      | - | -      | -  | -      | -  | -      | - | 72     | 25  | 72    | 25    | 0.347      |
| SL0271                      | FFSC-03 | <i>(F. fujikuroi)</i>              | -      | -  | -      | -  | -      | - | -      | -  | -      | -  | -      | - | 69     | 19  | 69    | 19    | 0.275      |
| SL0300                      | FOSC-03 | <i>(F. fujikuroi)</i>              | 20     | 12 | 20     | 3  | -      | - | -      | 50 | 9      | -  | -      | - | -      | 90  | 24    | 0.267 |            |
| TC0091                      | FFSC-03 | <i>F. fujikuroi</i>                | -      | -  | -      | -  | -      | - | -      | -  | -      | -  | -      | - | 70     | 17  | 70    | 17    | 0.243      |
| Mel02010 (Melon pathogen)   | FOSC-01 | <i>F. oxysporum</i> f. sp. melonis | 20     | 6  | 20     | 2  | -      | - | -      | -  | -      | -  | -      | - | -      | 40  | 8     | 0.200 |            |
| TC0089                      | FFSC-10 | <i>F. fujikuroi</i>                | -      | -  | -      | -  | 10     | 2 | -      | -  | -      | -  | -      | - | -      | 10  | 2     | 0.200 |            |
| TC0095                      | FSSC-10 | <i>(F. proliferatum)</i>           | -      | -  | -      | -  | 10     | 2 | -      | -  | -      | -  | -      | - | -      | 10  | 2     | 0.200 |            |
| TC0108                      | FFSC-11 | <i>F. solani</i>                   | -      | -  | -      | -  | 10     | 0 | -      | 50 | 9      | -  | -      | - | -      | 60  | 9     | 0.150 |            |
| TC0083                      | FFSC-09 | (New species)                      | -      | -  | -      | -  | 7      | 1 | -      | -  | -      | -  | -      | - | -      | 7   | 1     | 0.143 |            |
| TC0074                      | FSSC-08 | <i>(F. fractiflexum)</i>           | -      | -  | -      | -  | 10     | 0 | 20     | 0  | 50     | 9  | -      | - | -      | 80  | 9     | 0.113 |            |
| TC0073                      | FSSC-04 | <i>F. solani</i>                   | -      | -  | -      | -  | -      | - | -      | 20 | 0      | -  | 49     | 5 | -      | 49  | 5     | 0.102 |            |
| SL0364                      | FOSC-01 | <i>F. solani</i>                   | 19     | 5  | 20     | 1  | -      | - | 20     | 0  | -      | -  | -      | - | -      | 59  | 6     | 0.102 |            |
| TC0008                      | FOSC-04 | <i>F. oxysporum</i>                | -      | -  | -      | -  | 10     | 1 | -      | -  | -      | -  | -      | - | -      | 10  | 1     | 0.100 |            |
| TC0031                      | FFSC-07 | <i>F. fujikuroi</i>                | -      | -  | -      | -  | 10     | 1 | -      | -  | -      | -  | -      | - | -      | 10  | 1     | 0.100 |            |
| TC0068                      | FSSC-09 | (New species)                      | -      | -  | -      | -  | 10     | 1 | -      | -  | -      | -  | -      | - | -      | 10  | 1     | 0.100 |            |
| TC0111                      | FOSC-03 | <i>F. solani</i>                   | -      | -  | -      | -  | 10     | 1 | -      | -  | -      | -  | -      | - | -      | 10  | 1     | 0.100 |            |
| TC0066                      | FFSC-08 | <i>F. fujikuroi</i>                | -      | -  | -      | -  | 10     | 0 | 20     | 0  | 50     | 0  | -      | - | 70     | 10  | 150   | 10    | 0.067      |
| TC0078                      | FFSC-03 | <i>(F. fujikuroi)</i>              | -      | -  | -      | -  | 10     | 0 | -      | -  | 50     | 3  | -      | - | -      | 60  | 3     | 0.050 |            |
| SL0370                      | FSSC-04 | <i>(F. fujikuroi)</i>              | -      | -  | -      | -  | -      | - | -      | -  | -      | -  | 50     | 2 | -      | 50  | 2     | 0.040 |            |
| MAFF 235151                 | FFSC-02 | <i>F. solani</i>                   | -      | -  | -      | -  | -      | - | -      | -  | -      | -  | -      | - | 51     | 2   | 51    | 2     | 0.039      |
| AFM06-014A (Rice pathogen)  | FFSC-12 | <i>(F. fujikuroi)</i>              | -      | -  | -      | -  | 10     | 0 | 20     | 1  | -      | -  | -      | - | -      | 30  | 1     | 0.033 |            |
| TC0001                      | FOSC-01 | <i>(F. fujikuroi)</i>              | -      | -  | -      | -  | 10     | 0 | 20     | 1  | -      | -  | -      | - | -      | 30  | 1     | 0.033 |            |
| TC0005                      | FOSC-05 | <i>F. oxysporum</i>                | -      | -  | -      | -  | 10     | 0 | 20     | 1  | -      | -  | -      | - | -      | 30  | 1     | 0.033 |            |
| TC0007                      | FSSC-03 | <i>F. solani</i>                   | -      | -  | -      | -  | 10     | 0 | 20     | 1  | -      | -  | -      | - | -      | 30  | 1     | 0.033 |            |
| TC0070                      | FOSC-09 | <i>F. oxysporum</i>                | -      | -  | -      | -  | 10     | 0 | 20     | 0  | 50     | 2  | -      | - | -      | 80  | 2     | 0.025 |            |
| TC0179                      | FSSC-04 | <i>F. solani</i>                   | -      | -  | -      | -  | -      | - | -      | -  | -      | 50 | 1      | - | -      | 50  | 1     | 0.020 |            |
| TC0245                      | FSSC-04 | <i>F. solani</i>                   | -      | -  | -      | -  | -      | - | -      | -  | -      | 50 | 1      | - | -      | 50  | 1     | 0.020 |            |
| TC0010                      | FSSC-01 | <i>F. solani</i>                   | -      | -  | -      | -  | 10     | 0 | 20     | 0  | 50     | 1  | -      | - | -      | 80  | 1     | 0.013 |            |
| TC0003                      | FSSC-04 | <i>F. solani</i>                   | -      | -  | -      | -  | 10     | 0 | 20     | 0  | 50     | 0  | 1      | - | -      | 130 | 1     | 0.008 |            |
| TC0058                      | FSSC-04 | <i>F. solani</i>                   | -      | -  | -      | -  | -      | - | -      | -  | -      | -  | 50     | 0 | -      | 50  | 0     | 0.000 |            |
| Uninoculated                | -       | -                                  | 20     | 0  | 20     | 0  | 20     | 0 | 20     | 0  | 50     | 0  | 50     | 0 | 70     | 0   | 250   | 0     | 0.000      |

<sup>a</sup> Exp. 1 was performed from 10 June 2010 to 1 July 2010; Exp. 2 was from 25 August 2010 to 15 September 2010; Exp. 3 was from 14 September 2010 to 6 October 2010; Exp. 4 was from 25 October 2010 to 22 November 2010; Exp. 5 was from 15 December 2010 to 9 January 2011; Exp. 6 was from 25 January 2011 to 18 February 2011; and Exp. 7 was from 4 February 2011 to 3 March 2011.

T, number of tested plants; D, number of plants from which *Fusarium* was recovered.

**Table 8.** Inoculation and reisolation of *Fusarium* strains from melon plants.<sup>a</sup>

| Isolate/strain              | EFST    | Species complex                                  | Exp. 1 |   | Exp. 2 |    | Exp. 3 |    | Total |    | Proportion reisolated |
|-----------------------------|---------|--------------------------------------------------|--------|---|--------|----|--------|----|-------|----|-----------------------|
|                             |         |                                                  | T      | D | T      | D  | T      | D  | T     | D  |                       |
| SL0303                      | FOSC-03 | <i>F. oxysporum</i>                              | –      | – | 20     | 18 | –      | –  | 20    | 18 | 0.900                 |
| Mel02010 (Melon pathogen)   | FOSC-01 | <i>F. oxysporum</i><br>f. sp. <i>melonis</i>     | –      | – | –      | –  | 20     | 17 | 20    | 17 | 0.850                 |
| SL0301                      | FOSC-03 | <i>F. oxysporum</i>                              | –      | – | 20     | 17 | –      | –  | 20    | 17 | 0.850                 |
| SL0317                      | FOSC-03 | <i>F. oxysporum</i>                              | –      | – | 20     | 15 | –      | –  | 20    | 15 | 0.750                 |
| SL0321                      | FOSC-03 | <i>F. oxysporum</i>                              | –      | – | 20     | 15 | –      | –  | 20    | 15 | 0.750                 |
| SL0316                      | FOSC-03 | <i>F. oxysporum</i>                              | –      | – | 20     | 13 | –      | –  | 20    | 13 | 0.650                 |
| SL0300                      | FOSC-03 | <i>F. oxysporum</i>                              | 9      | 6 | 20     | 16 | 20     | 4  | 49    | 26 | 0.531                 |
| 880621a-1 (Tomato pathogen) | FOSC-03 | <i>F. oxysporum</i><br>f. sp. <i>lycopersici</i> | –      | – | 20     | 13 | 20     | 3  | 40    | 16 | 0.400                 |
| SL0364                      | FOSC-01 | <i>F. oxysporum</i>                              | –      | – | –      | –  | 20     | 5  | 20    | 5  | 0.250                 |
| Uninoculated                | –       | –                                                | 9      | 0 | 20     | 0  | 20     | 0  | 49    | 0  | 0.000                 |

<sup>a</sup>Exp.1 was performed from 28 April 2010 to 26 May 2010; Exp. 2 was from 14 June 2010 to 5 July 2010; and Exp. 3 was from 25 August 2010 to 15 September 2010.

## ACKNOWLEDGEMENTS

We appreciate the critical review of earlier drafts of the manuscript and suggestions provided by Kerry O'Donnell. We thank Takayuki Aoki, Koji Azegami, Masato Kawabe and Masafumi Shimizu for valuable suggestions. We are grateful to Takashi Tsuge, Yoshimiki Amemiya, Tsutomu Arie, Shin-ichi Fuji, Hayato Horinouchi, Kazuhiro Nakaho, Toshiyuki Usami and Hideki Watanabe for providing fusaria.

## FUNDING

This work was supported financially in part by the Ministry of Agriculture, Forestry and Fisheries of Japan through a research project entitled 'Development of technologies for mitigation and adaptation to climate change in Agriculture, Forestry and Fisheries'.

**Conflict of interest.** None declared.

## REFERENCES

- Alabouvette C, Edel V, Lemanceau P, et al. Diversity and interactions among strains of *Fusarium oxysporum*: application to biological control. In: Jeger MJ, Spence NJ, et al. (eds), *Biotic Interactions in Plant-pathogen Associations*. Oxfordshire, UK: CABI Publishing, 2001, 131–58.
- Altschul SF, Gish W, Miller W, et al. Basic local alignment search tool. *J Mol Biol* 1990;215:403–10.
- Amemiya Y, Koike M, Hirano K. Suppression of *Verticillium* wilt in tomato by non-pathogenic isolates of *Fusarium oxysporum*. *Soil Microorg* 1989;33:27–34.
- Aoki T. Taxonomic system of the genus *Fusarium*. *Microbiol Cult Coll* 2009;25:1–12 {Written in Japanese}.
- Aoki T, O'Donnell K, Homma Y, et al. Sudden-death syndrome of soybean is caused by two morphologically and phylogenetically distinct species within the *Fusarium solani* species complex—*F. virguliforme* in North America and *F. tucumaniae* in South America. *Mycologia* 2003;95:660–84.
- Armstrong GM, Armstrong JK. Nonsusceptible hosts as carriers of wilt Fusaria. *Phytopathology* 1948;38:808–26.
- Baayen RP, O'Donnell K, Bonants PJM, et al. Gene genealogies and AFLP analyses in the *Fusarium oxysporum* complex identify monophyletic and nonmonophyletic formae speciales causing wilt and rot disease. *Phytopathology* 2000;90:891–900.
- Backhouse D, Burgess LW, Summerell BA. Biogeography of *Fusarium*. In: Summerell BA, Leslie JF, Backhouse D, et al. (eds) *Fusarium*. St. Paul, MN: APS Press, 2001, 122–37.
- Bacon CW, Yates IE. Endophytic root colonization by *Fusarium* species: histology, plant interactions, and toxicity. In: Schulz BJE, Boyle CJC, Sieber TN (eds), *Microbial Root Endophytes*. Heidelberg, Germany: Springer, 2006, 133–52.
- Banihashemi Z, deZeeuw DJ. The behavior of *Fusarium oxysporum* f. sp. *melonis* in the presence and absence of host plants. *Phytopathology* 1975;65:1212–7.
- Bao JR, Fravel DR, O'Neill NR, et al. Genetic analysis of pathogenic and nonpathogenic *Fusarium oxysporum* from tomato plants. *Can J Bot* 2002;80:271–9.
- Benhamou N, Garand C, Goulet A. Ability of nonpathogenic *Fusarium oxysporum* strain Fo47 to induce resistance against *Pythium ultimum* infection in cucumber. *Appl Environ Microb* 2002;68:4044–60.
- Burgess LW, Nelson PE, Toussoun TA, et al. Distribution of *Fusarium* species in sections Roseum, Arthrosporiella, Gibbosum and Discolor recovered from grassland, pasture and pine nursery soils of eastern Australia. *Mycologia* 1988;80:815–24.
- Castellá G, Bragulat MR, Rubiales MV, et al. Malachite green agar, a new selective medium for *Fusarium* spp. *Mycopathologia* 1997;137:173–8.
- Desjardins AE. *Fusarium* Mycotoxins – Chemistry, Genetics, and Biology. St. Paul, MN, USA: APS Press, 2006.
- Enya J, Togawa M, Takeuchi T, et al. Biological and phylogenetic characterization of *Fusarium oxysporum* complex, which causes yellows on *Brassica* spp., and proposal of *F. oxysporum* f. sp. *rapae*, a novel forma specialis pathogenic on *B. rapa* in Japan. *Phytopathology* 2008;98:475–83.
- Fourie G, Steenkamp ET, Gordon TR, et al. Evolutionary relationships among the *Fusarium oxysporum* f. sp. *cubense* vegetative compatibility groups. *Appl Environ Microb* 2009;75:4770–81.
- Geiser DM, Jiménez-Gasco MM, Kang S, et al. FUSARIUM-ID v. 1.0: A DNA sequence database for identifying *Fusarium*. *Eur J Plant Pathol* 2004;110:473–9.
- Gullino ML, Katan J, Garibaldi A. The genus *Fusarium* and the species that affect greenhouse vegetables and ornamentals. In: Gullino ML, Katan J, Garibaldi A (eds). *Fusarium Wilts of Greenhouse Vegetable and Ornamental Crops*. St. Paul, MN: APS Press, 2012, 5–9.
- Gordon TR, Okamoto D, Jacobson DJ. Colonization of muskmelon and nonsusceptible crops by *Fusarium oxysporum* f. sp. *melonis*

- and other species of *Fusarium*. *Phytopathology* 1989;79:1095–100.
- Hallman J, Sikora RA. Influence of *Fusarium oxysporum*, a mutualistic fungal endophyte, on *Meloidogyne incognita* infection of tomato. *J Plant Dis Protect* 1994;101:475–81.
- Helbig JB, Carroll RB. Dicotyledonous weeds as a source of *Fusarium oxysporum* pathogenic on soybean. *Plant Dis* 1984;68:694–6.
- Inácio J, Pereira P, de Carvalho M, et al. Estimation and diversity of phylloplane mycobiota on selected plants in a Mediterranean-type ecosystem in Portugal. *Microb Ecol* 2002;44:344–53.
- Jeanmougin F, Thompson JD, Gouy M, et al. Multiple sequence alignment with Clustal X. *Trends Biochem Sci* 1998;23:403–5.
- Jiménez-Fernández D, Navas-Cortés JA, Montes-Borrego M, et al. Molecular and pathogenic characterization of *Fusarium redolens*, a new causal agent of Fusarium yellows in chickpea. *Plant Dis* 2011;95:860–70.
- Jukes TH, Cantor CR. Evolution of protein molecules. In: Munro HN (ed). *Mammalian Protein Metabolism*. New York, NY: Academic Press, 1969, 21–132.
- Katan J. Symptomless carriers of the tomato Fusarium wilt pathogen. *Phytopathology* 1971;61:1213–7.
- Kavroulakis N, Ntougias S, Zervakis GI, et al. Role of ethylene in the protection of tomato plants against soil-borne fungal pathogens conferred by an endophytic *Fusarium solani* strain. *J Exp Bot* 2007;58:3853–64.
- Kim H-Y, Choi GJ, Lee HB, et al. Some fungal endophytes from vegetable crops and their anti-oomycete activities against tomato late blight. *Lett Appl Microbiol* 2007;44:332–7.
- Kistler HC. Genetic diversity in the plant-pathogenic fungus *Fusarium oxysporum*. *Phytopathology* 1997;87:474–9.
- Komada H. Development of a selective medium for quantitative isolation of *Fusarium oxysporum* from natural soil. *Rev Plant Protec Res* 1975;8:114–25.
- Kuldau GA, Yates IE. Evidence for *Fusarium endophytes* in cultivated and wild plants. In: Bacon CW, White JF (eds), *Microbial Endophytes*. New York, NY: Marcel Dekker, 2000, 85–117.
- Larkin MA, Blackshields G, Brown NP, et al. Clustal W and Clustal X version 2.0. *Bioinformatics* 2007;23:2947–8.
- Leslie JF, Pearson CAS, Nelson PE, et al. *Fusarium* spp. from corn, sorghum and soybean fields in the central and eastern United States. *Phytopathology* 1990;80:343–50.
- Leslie JF, Summerell BA. *The Fusarium Laboratory Manual*. Ames, IA: Blackwell Publishing, 2006.
- Ma LJ, van der Does HC, Borkovich KA, et al. Comparative genomics reveals mobile pathogenicity chromosomes in *Fusarium*. *Nature* 2010;464:367–73.
- Massart S, Jijakli HM. Use of molecular techniques to elucidate the mechanisms of action of fungal biocontrol agents: a review. *J Microbiol Meth* 2007;69:229–41.
- Migheli Q, Balmas V, Harak H, et al. Molecular phylogenetic diversity of dermatologic and other human pathogenic fusarial isolates from hospitals in northern and central Italy. *J Clin Microbiol* 2010;48:1076–84.
- Nagao H, Couteaudie Y, Alabouvette C. Colonization of sterilized soil and flax roots by strains of *Fusarium oxysporum* and *Fusarium solani*. *Symbiosis* 1990;9:343–54.
- Nash SM, Snyder WC. Quantitative estimations by plate counts of propagules of the bean root rot *Fusarium* in field soils. *Phytopathology* 1962;52:567–72.
- Nirenberg NI, Aoki T. *Fusarium nisikadoi*, a new species from Japan. *Mycoscience* 1997;38:329–33.
- Nishimura N. Selective media for *Fusarium oxysporum*. *J Gen Plant Pathol* 2007;73:342–8.
- Nitschke E, Nihlgard M, Varrelmann M. Differentiation of eleven *Fusarium* spp. isolated from sugar beet, applying restriction fragment analysis of polymerase chain reaction-amplified translation elongation factor 1 $\alpha$  gene fragment. *Phytopathology* 2009;99:921–9.
- O'Donnell K. Molecular phylogeny of the *Nectria haematococca-Fusarium solani* species complex. *Mycologia* 2000;92:919–38.
- O'Donnell K, Cigelnik E, Nirenberg HI. Molecular systematics and phylogeography of the *Gibberella fujikuroi* species complex. *Mycologia* 1998;90:465–93.
- O'Donnell K, Gueidan C, Sink S, et al. A two-locus DNA sequence database for typing plant and human pathogens within the *Fusarium oxysporum* species complex. *Fungal Genet Biol* 2009;46:936–48.
- O'Donnell K, Kistler HC, Cigelnik E, et al. Multiple evolutionary origins of the fungus causing Panama disease of banana: concordant evidence from nuclear and mitochondrial gene genealogies. *P Natl Acad Sci USA* 1998;95:2044–9.
- O'Donnell K, Nirenberg HI, Aoki T, et al. A Multigene phylogeny of the *Gibberella fujikuroi* species complex: detection of additional phylogenetically distinct species. *Mycoscience* 2000;41:61–78.
- O'Donnell K, Sutton DA, Fothergill A, et al. Molecular phylogenetic diversity, multilocus haplotype nomenclature, and in vitro antifungal resistance within the *Fusarium solani* species complex. *J Clin Microbiol* 2008a;46:2477–90.
- O'Donnell K, Ward TJ, Aberra D, et al. Multilocus genotyping and molecular phylogenetics resolve a novel head blight pathogen within the *Fusarium graminearum* species complex from Ethiopia. *Fungal Genet Biol* 2008b;45:1514–22.
- O'Donnell K, Ward TJ, Geiser DM, et al. Genealogical concordance between the mating type locus and seven other nuclear genes supports formal recognition of nine phylogenetically distinct species within the *Fusarium graminearum* clade. *Fungal Genet Biol* 2004;41:600–23.
- Ogawa K, Komada H. Biological control of Fusarium wilt of sweet potato by non-pathogenic *Fusarium oxysporum*. *Ann Phytopathol Soc Jpn* 1984;50:1–9.
- Park B, Park J, Cheong KC, et al. Cyber infrastructure for *Fusarium*: three integrated platforms supporting strain identification, phylogenetics, comparative genomics and knowledge sharing. *Nucleic Acids Res* 2011;39:D640–6 {Database issue}.
- Schneider RW. Effects of nonpathogenic strains of *Fusarium oxysporum* on celery root infection by *F. oxysporum* f. sp. *apii* and a novel use of the Lineweaver-Burk double reciprocal plot technique. *Phytopathology* 1984;74:646–53.
- Schroers H-J, Baayen RP, Meffert JP, et al. *Fusarium foetens*, a new species pathogenic to begonia elatior hybrids (*Begonia*  $\times$  *hiemalis*) and the sister taxon of the *Fusarium oxysporum* species complex. *Mycologia* 2004;96:393–406.
- Shishido M, Loeb BM, Chanway CP. External and internal root colonization of lodgepole pine seedlings by two growth-promoting *Bacillus* strains originated from different root microsites. *Can J Microbiol* 1995;41:707–13.
- Shishido M, Miwa C, Usami T, et al. Biological control efficiency of Fusarium wilt of tomato by nonpathogenic *Fusarium oxysporum* Fo-B2 in different environments. *Phytopathology* 2005;95:1072–80.
- Skovgaard K, Rosendahl S, O'Donnell K, et al. *Fusarium commune* is a new species identified by morphological and molecular phylogenetic data. *Mycologia* 2003;95:630–6.

- Starkey DE, Ward TJ, Aoki T, et al. Global molecular surveillance reveals novel *Fusarium* head blight species and trichothecene toxin diversity. *Fungal Genet Biol* 2007;**44**:1191–204.
- Tamura K, Peterson D, Peterson N, et al. MEGA5: molecular evolutionary genetics analysis using maximum likelihood, evolutionary distance, and maximum parsimony methods. *Mol Biol Evol* 2011;**28**:2731–9.
- Windels CE, Kommedahl T. Population differences in indigenous *Fusarium* species by corn culture of prairie soil. *Am J Bot* 1974;**61**:141–5.
- Wulff EG, Sørensen JL, Lübeck M, et al. *Fusarium* spp. associated with rice Bakanae: ecology, genetic diversity, pathogenicity and toxigenicity. *Environ Microbiol* 2010;**12**: 649–57.
